# Supplementary material for: Dengue Infections during COVID-19 Period: Reflection of Reality or Elusive Data Due to Effect of Pandemic
Source: MDPI journal article supplement (doi:10.3390/ijerph191710768), 2022-08-29
Supplement: s1 [file s1]

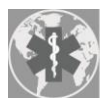

## Supplementary Data

**Supplementary Table S1.** COVID-19 and dengue cases in the Asian and Latin American countries during the COVID-19 pandemic period (2020~2021).

| Region/Country                          | COVID-19 Cases    |                   | Dengue Cases     |                  |
|-----------------------------------------|-------------------|-------------------|------------------|------------------|
|                                         | 2020              | 2021              | 2020             | 2021             |
| <i>Asian Countries (Total)</i>          | <b>12,614,453</b> | <b>40,666,985</b> | <b>578,094</b>   | <b>560,577</b>   |
| India                                   | 10,286,329        | 24,575,250        | 44,585           | 193,245          |
| Indonesia                               | 743,198           | 3,519,522         | 95,971           | 71,796           |
| Bangladesh                              | 513,510           | 1,072,029         | 1405             | 28,429           |
| Philippines                             | 474,055           | 2,369,814         | 90,135           | 79,872           |
| Nepal                                   | 260,593           | 564,838           | 428              | 365              |
| Pakistan                                | 113,884           | 330,944           | 6016             | 52,894           |
| Malaysia                                | 113,010           | 2,645,076         | 88,845           | 25,794           |
| Singapore                               | 58,599            | 220,806           | 35,315           | 5116             |
| Sri Lanka                               | 42,702            | 544,044           | 31,162           | 24,942           |
| Thailand                                | 6884              | 2,216,551         | 50,911           | 7180             |
| Vietnam                                 | 1689              | 2,608,111         | 133,321          | 70,944           |
| <i>Latin American Countries (Total)</i> | <b>14,136,813</b> | <b>27,690,192</b> | <b>2,217,728</b> | <b>1,227,652</b> |
| Brazil                                  | 7,718,847         | 14,568,674        | 1,467,142        | 975,474          |
| Colombia                                | 1,642,775         | 3,514,665         | 78,979           | 53,334           |
| Argentina                               | 1,625,514         | 4,028,894         | 59,358           | 3972             |
| Mexico                                  | 1,413,935         | 2,555,751         | 120,639          | 36,742           |
| Peru                                    | 1,015,137         | 1,281,694         | 563,94           | 49,274           |
| Ecuador                                 | 212,512           | 338,741           | 16,570           | 20,592           |
| Bolivia                                 | 158,372           | 441,381           | 109,010          | 8947             |
| Honduras                                | 121,827           | 257,625           | 25,180           | 19,753           |
| Venezuela                               | 113,884           | 330,944           | 6721             | 5926             |
| Paraguay                                | 107,964           | 360,382           | 223,782          | 16,897           |
| Nicaragua                               | 6046              | 11,441            | 53,953           | 36,741           |

**Supplementary Table S2.** The number of dengue cases may observe during the ongoing pandemic year (2022) in the Asian and Latin American countries.

| Region/Country                  | Reported Average Cases<br>between 2015~2021 | Predicted Cases<br>in 2022 * | Possible Chance %<br>(Increase or Decrease) |
|---------------------------------|---------------------------------------------|------------------------------|---------------------------------------------|
| <i>Latin American Countries</i> |                                             |                              |                                             |
| Brazil                          | 1,194,102                                   | 1,181,121                    | −1.09                                       |
| Mexico                          | 134,859                                     | 79,310                       | −41.19                                      |
| Nicaragua                       | 76,873                                      | 78,971                       | +2.73                                       |
| Colombia                        | 75,348                                      | 65,186                       | −13.49                                      |
| Paraguay                        | 60,793                                      | 83,914                       | +38.03                                      |
| Peru                            | 39,077                                      | 43,422                       | +11.12                                      |
| Honduras                        | 36,861                                      | 44,879                       | +21.75                                      |
| Bolivia                         | 30,628                                      | 46,276                       | +51.09                                      |
| Argentina                       | 21,895                                      | 16,204                       | −25.99                                      |
| Venezuela                       | 19,974                                      | 10,837                       | −45.74                                      |
| Ecuador                         | 16,596                                      | 7628                         | −54.04                                      |
| <i>Asian Countries</i>          |                                             |                              |                                             |
| Philippines                     | 207,353                                     | 152,753                      | −26.33                                      |
| Vietnam                         | 159,487                                     | 153,369                      | −3.83                                       |
| India                           | 130,545                                     | 141,938                      | +8.73                                       |
| Indonesia                       | 117,491                                     | 64,678                       | −44.95                                      |
| Malaysia                        | 89,769                                      | 52,929                       | −41.04                                      |
| Thailand                        | 84,023                                      | 26,087                       | −68.95                                      |
| Sri Lanka                       | 69,120                                      | 48,615                       | −29.67                                      |
| Bangladesh                      | 21,904                                      | 45,486                       | +107.66                                     |
| Pakistan                        | 21,330                                      | 42,862                       | +109.14                                     |
| Singapore                       | 12,409                                      | 18,002                       | +45.08                                      |
| Nepal                           | 3338                                        | 5392                         | +61.50                                      |

\* Predicted dengue cases calculated based on the reported yearly cases between 2015~2021

“+” indicated the possibility of an increase in dengue cases; “−” indicated the possibility decrease in dengue cases
